# Supplementary material for: Janus-type ionic conductive gels based on poly(N,N-dimethyl)acrylamide for strain/pressure sensors
Source: Royal Society of Chemistry journal article supplement (doi:10.1039/d3sm01073b), 2023-01-01
Supplement: d3sm01073b2.pdf [file d3sm01073b2.pdf]

## Supporting Information

### Janus-type ionic conductive gels

#### based on poly(*N,N*-dimethyl)acrylamide for strain/pressure sensors

Chuanjiang Zhou, Yijia Yu, Wenjuan Xia, Shengjie Liu, Xiao Song, Zhaoqiang Wu\* and Hong  
Chen

E-mail: wzqwhu@suda.edu.cn

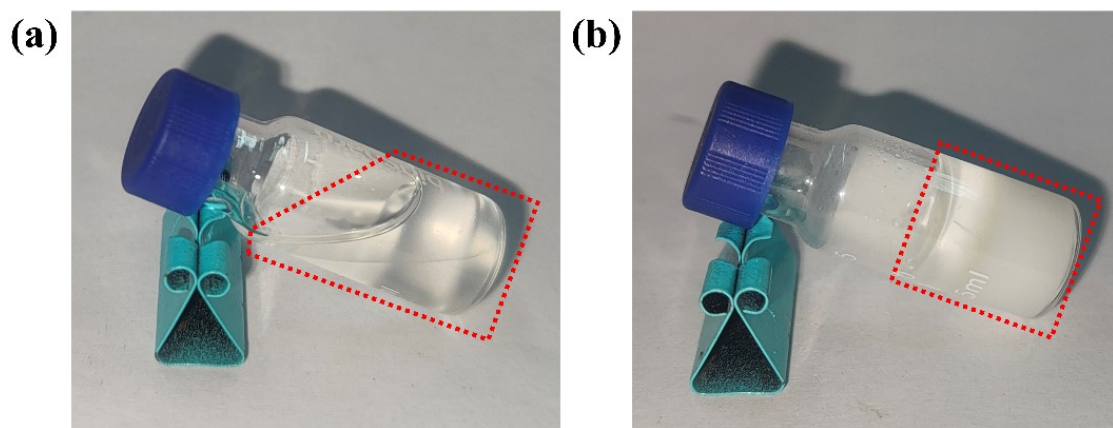

**Fig. S1** Optical digital photos of Janus gel (before and after photopolymerization): (a) Precursor solution. (b) Janus ionogel.

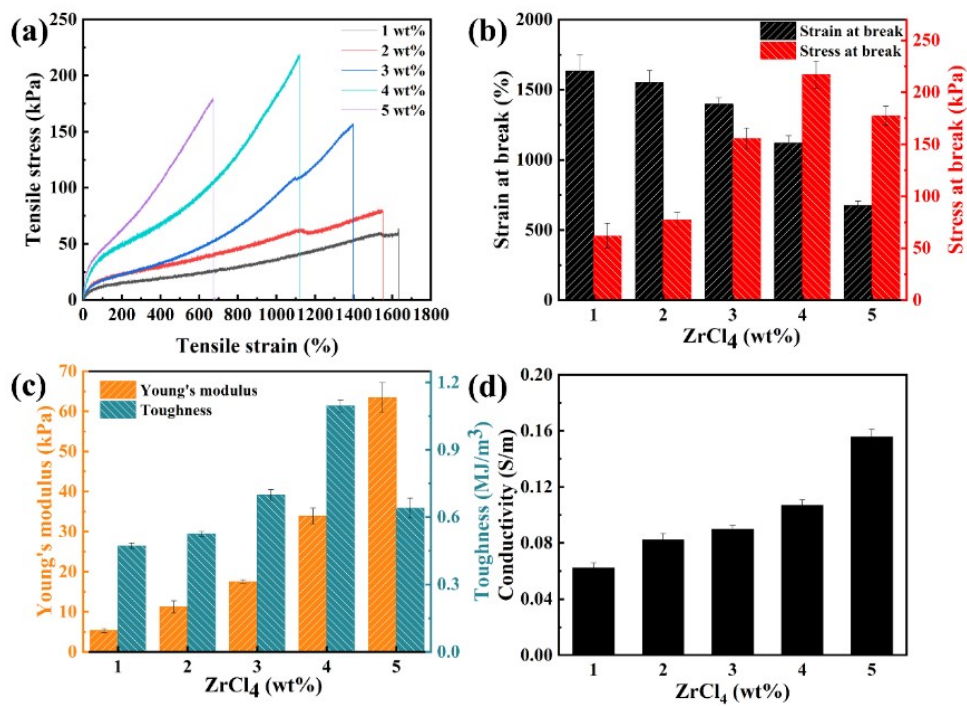

**Fig. S2** Janus conductive ionogel with different zirconium chloride contents: (a) Stress–strain curve. (b) Maximum tensile strength and elongation at break. (c) Young's modulus and toughness. (d) Conductivity.

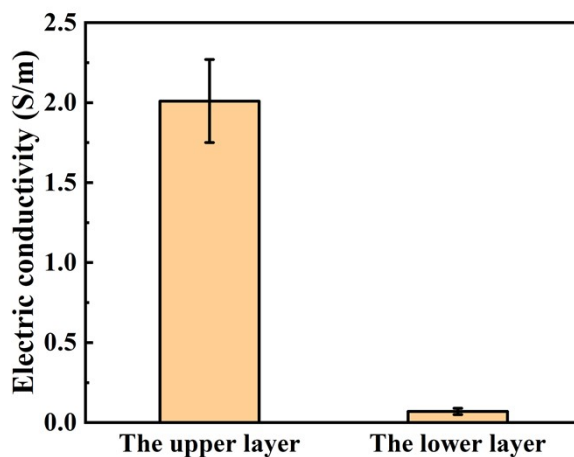

**Fig. S3** Electric conductivity of the upper and lower layers of the Janus ionogel after stripping.

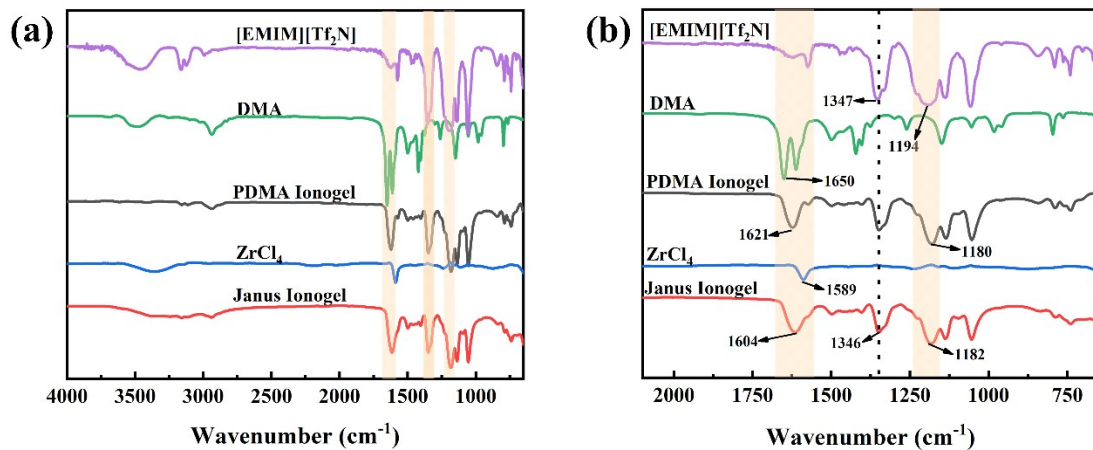

**Fig. S4** (a) FT-IR spectra of DMA, [EMIM][Tf<sub>2</sub>N], ZrCl<sub>4</sub> and ionogel. (b) Locally amplified FT-IR spectra.

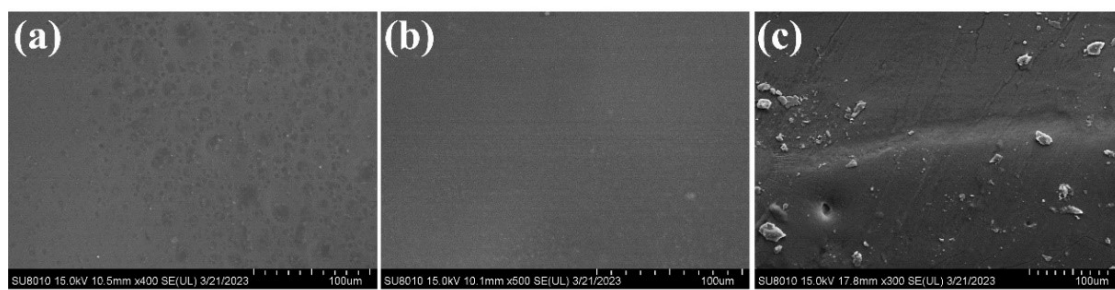

**Fig. S5** SEM images of the Janus-type ionogel: (a) The upper surface. (b) The lower surface. (c) The cross-section.

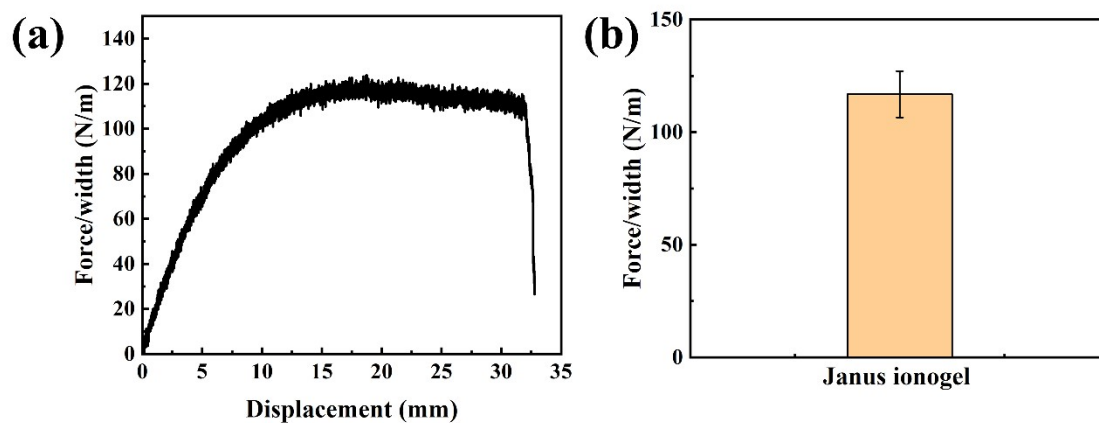

**Fig. S6** The interface strength of Janus ionogel: (a) Tensile stress–strain curves. (b) Peel strength.

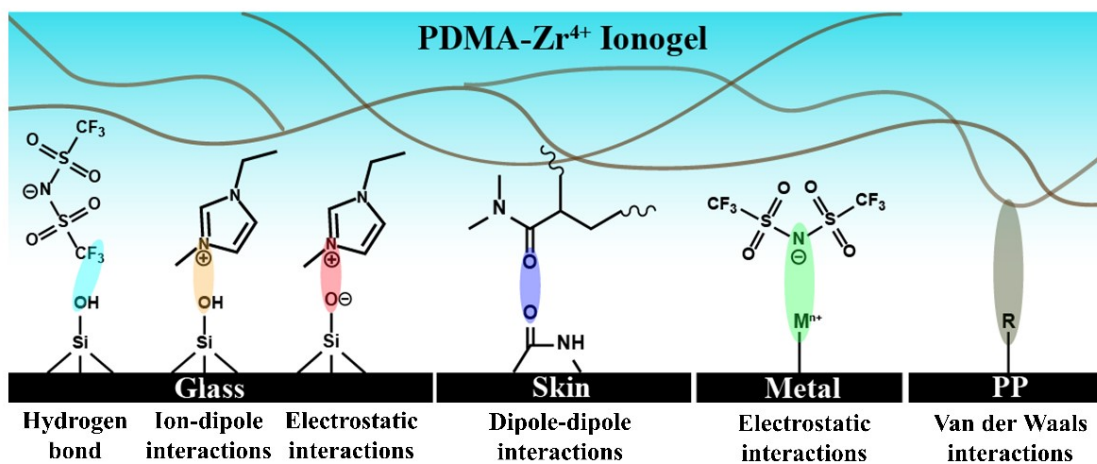

**Fig. S7** Adhesion mechanism of the Janus ionogel subsurface to different materials.

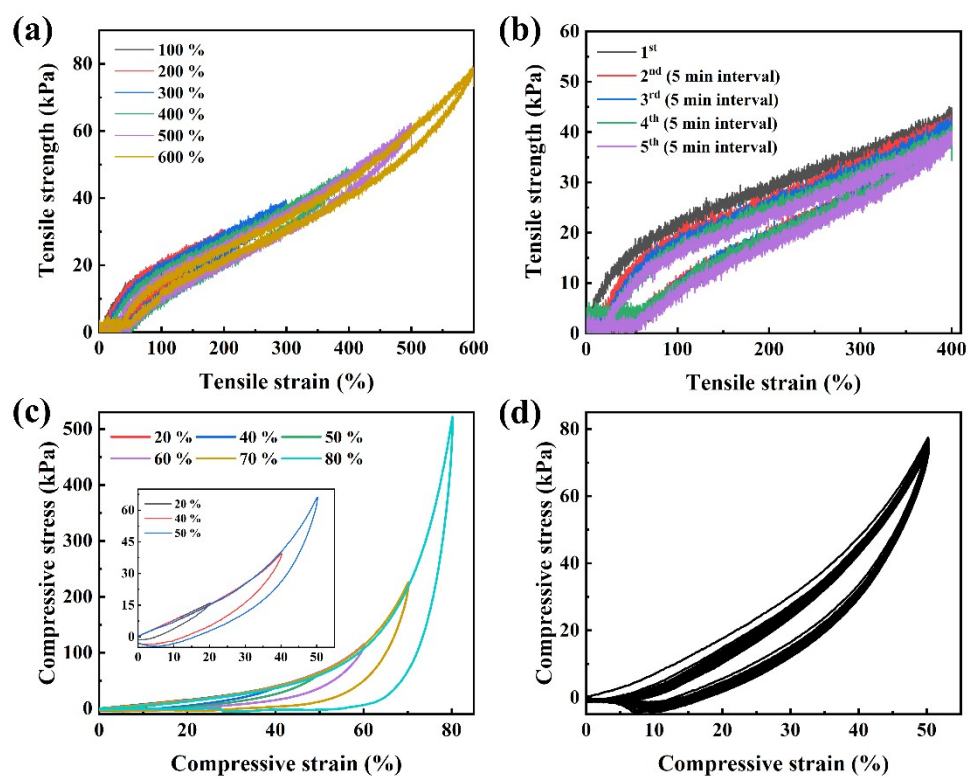

**Fig. S8** Mechanical stability of the Janus gel: (a) Cyclic loading–unloading curve under 100–600% strain. (b) The stress–strain curve under cyclic loading at 600% strain with a 5 min interval. (c) The compressive stress–strain curve under 20–80% compressive strain. (d) Noninterval cyclic compression loading–unloading tests at 90% compressive strain.

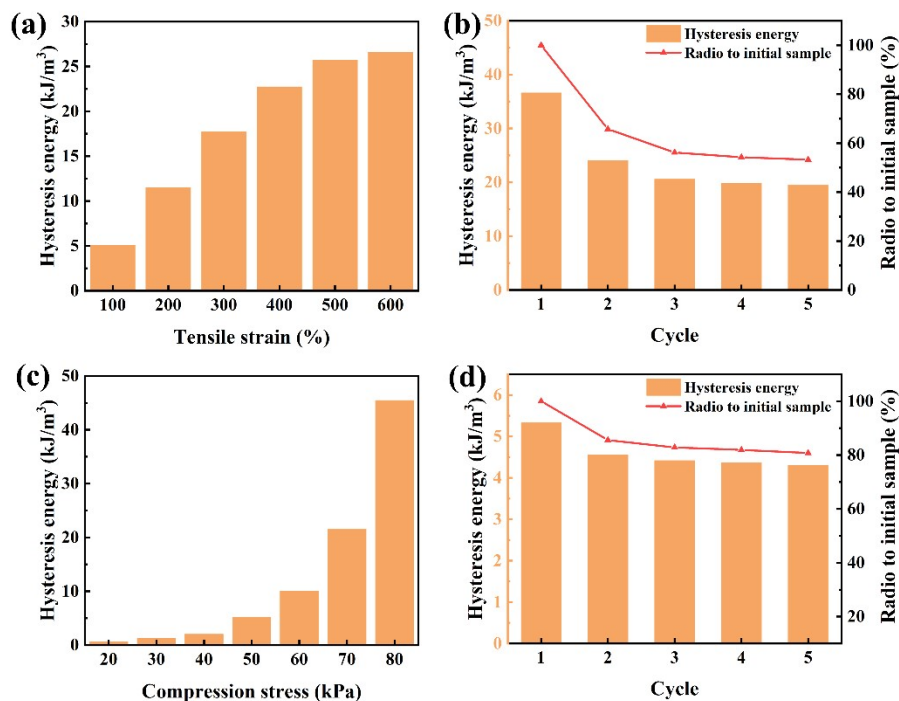

**Fig. S9** Loading-unloading experiment of Janus gel: (a) Corresponding hysteresis energy under different tensile strains (100-600%). (b) Corresponding hysteresis energy under different cycles at 400% strain. (c) Corresponding hysteresis energy under different compressive stresses (20 kPa-80 kPa). (d) Corresponding hysteresis energy under different cycles under a stress of 50 kPa.

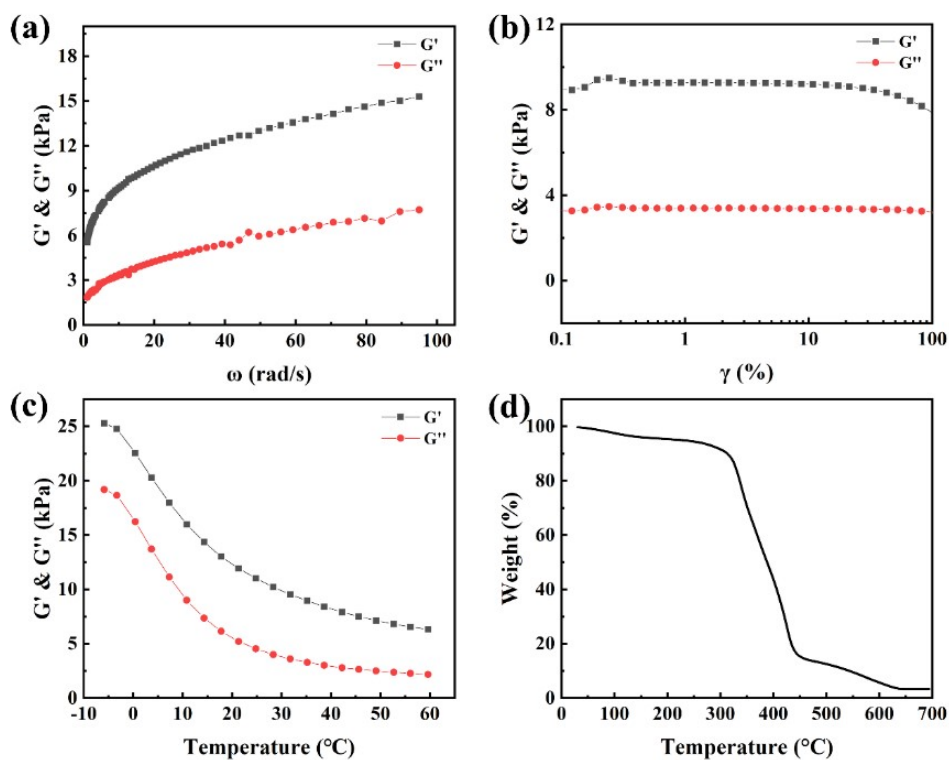

**Fig. S10** Dynamic mechanical properties and thermal stability of Janus ionic gel: (a) Frequency



sweep rheological curve. (b) Strain scanning rheological curve. (c) Rheological curves at different temperatures (angular frequency:  $10 \text{ rad s}^{-1}$ ). (d) TGA curve.

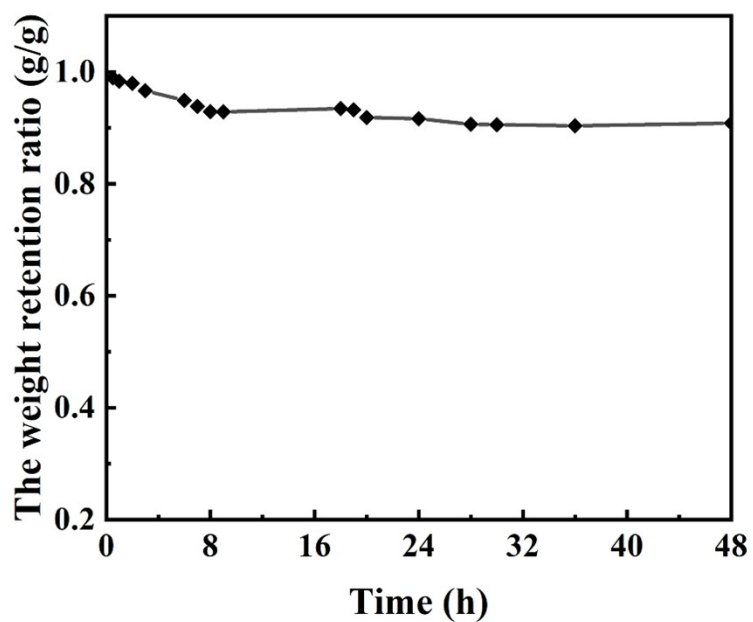

**Fig. S11** The weight change of the Janus gel over 2 days (temperature:  $21 \text{ }^{\circ}\text{C}$ , relative humidity: 70%).

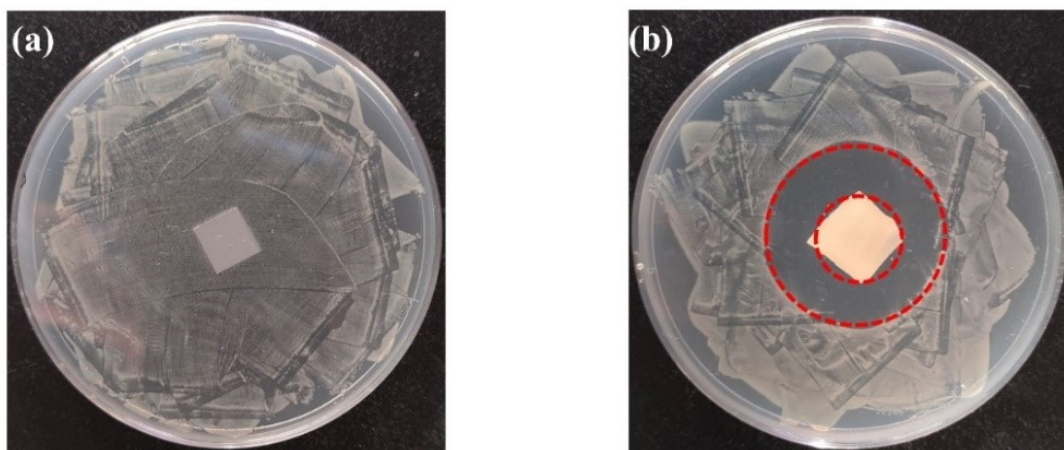

**Fig. S12** (a) Photos of the inhibition zone of the pure silicon wafer and (b) Janus ionogel on *E. coli*.
